# Supplementary material for: Context-Dependent Effects of Trichoderma Seed Inoculation on Anthracnose Disease and Seed Yield of Bean (Phaseolus vulgaris): Ambient Conditions Override Cultivar-Specific Differences
Source: MDPI journal article supplement (doi:10.3390/plants10081739), 2021-08-23
Supplement: s1 [file s1]

**Figure S1.** Results of Shapiro-Wilk test of normality distribution based on MANOVA test residuals.

| Data             | W       | P         |
|------------------|---------|-----------|
| MANOVA residuals | 0.69399 | < 2.2e-16 |

MANOVA (Multivariate ANOVA) residuals: Df = 569; Sum of Squares = 45344; Mean square = 49.69.

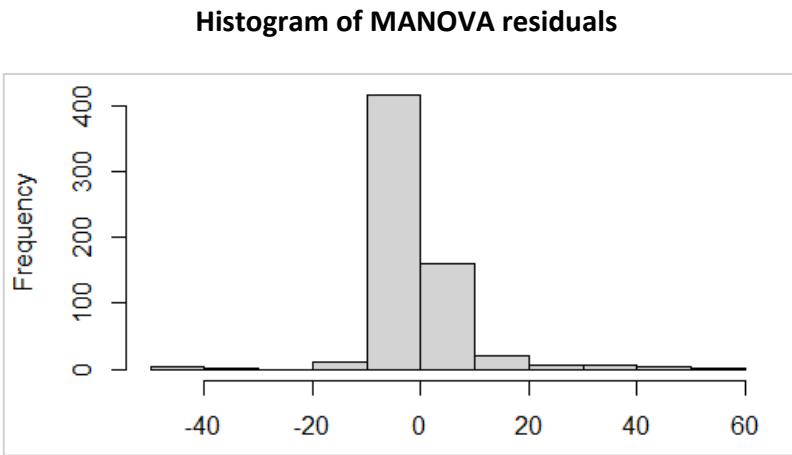

**Table S1.** Results of individual Kruskal-Wallis tests of the effects of experimental setup, bean cultivar and *Trichoderma* spp. on anthracnose severity.

| Factor      | Chi-squared | DF | P                      |
|-------------|-------------|----|------------------------|
| Setup       | 58.37       | 2  | 2.11×10 <sup>-13</sup> |
| Cultivar    | 9.15        | 3  | 0.02742                |
| Trichoderma | 19.80       | 4  | 0.00055                |

‘Setup’ refers to the experimental setup (A. greenhouse: sterile commercial substrate, B. greenhouse: field soil, and C. open field)

‘Cultivar’ refers to the four bean cultivars tested

‘Trichoderma’ refers to the inoculation of bean seeds with one of the four tested *Trichoderma* strains or no *Trichoderma* inoculation.

**Table S2.** Results of individual Kruskal-Wallis tests of the effects of soil type, bean cultivar and *Trichoderma* spp. on anthracnose severity on plants growing in the greenhouse.

| Factor      | Chi-squared | DF | P                      |
|-------------|-------------|----|------------------------|
| Soil type   | 49.33       | 1  | 2.16×10 <sup>-12</sup> |
| Cultivar    | 10.26       | 3  | 0.01647                |
| Trichoderma | 70.10       | 9  | 1.46×10 <sup>-11</sup> |

The two ‘soil types’ were sterile commercial substrate and soil collected from the open field

‘Cultivar’ refers to the four bean cultivars tested

‘Trichoderma’ refers to the inoculation of bean seeds with one of the four tested *Trichoderma* strains or no *Trichoderma* inoculation.

Figure S2. Split-plot design and spatial distribution of strain × cultivar combinations within each plot

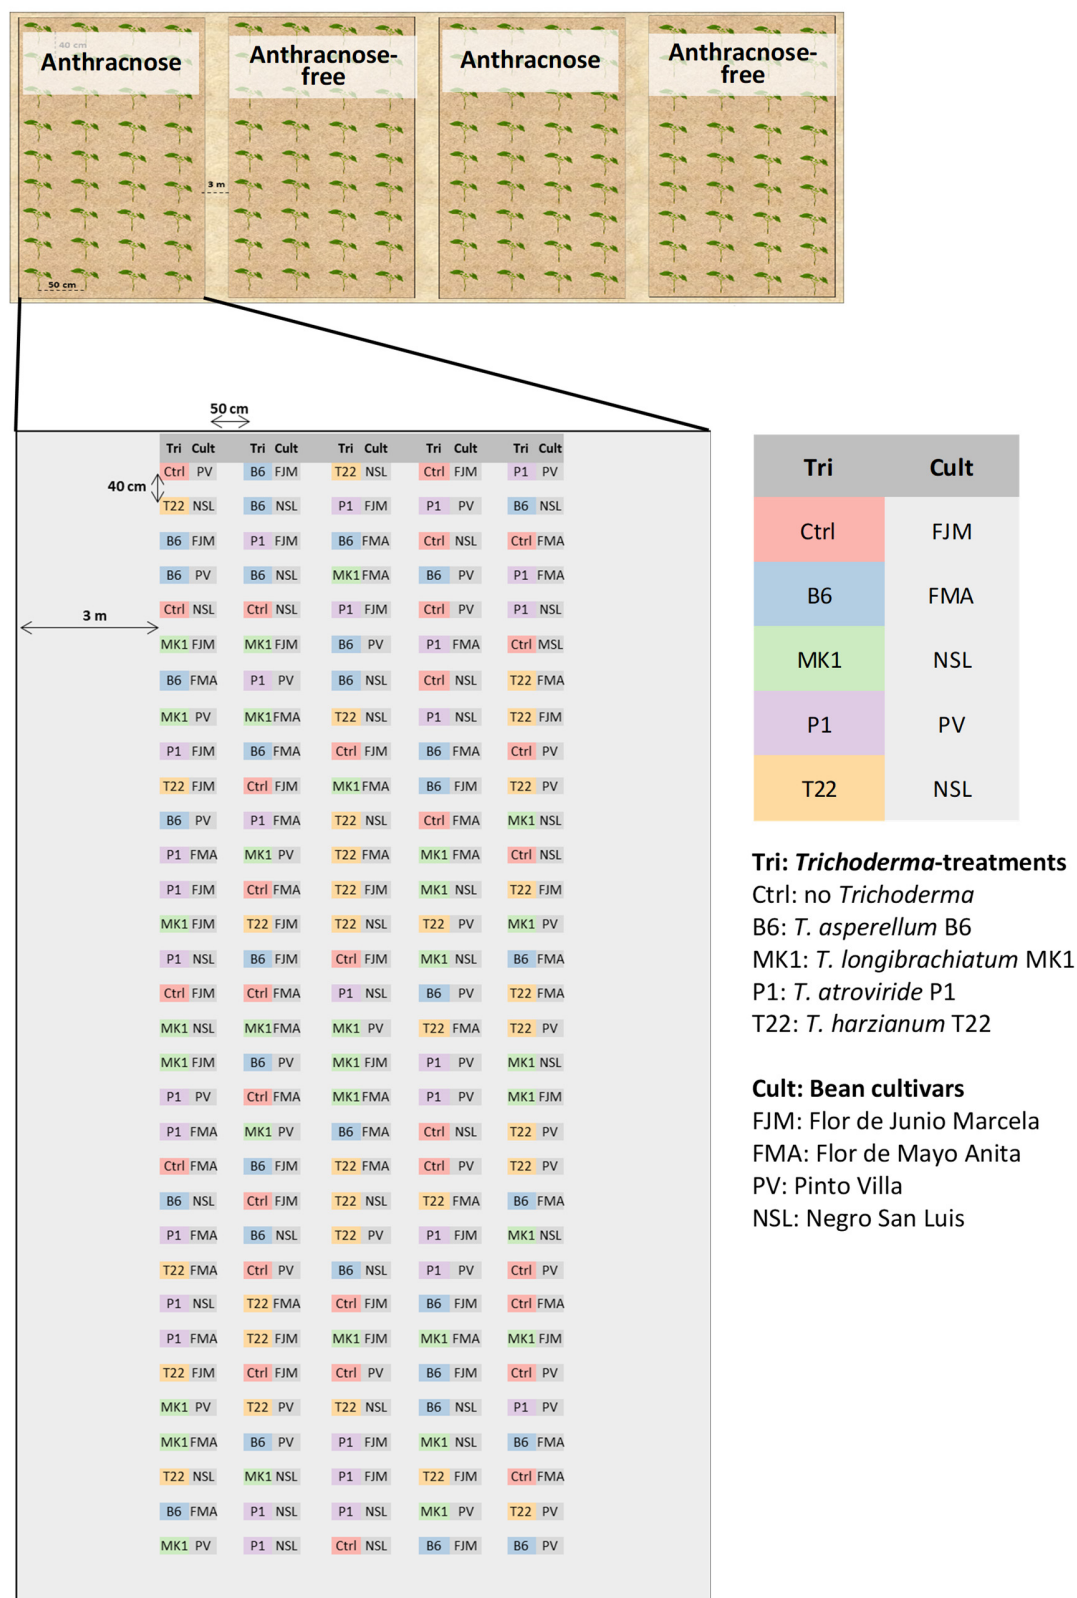

**Figure S3** Disease symptoms and herbivore-inflicted damage in the field

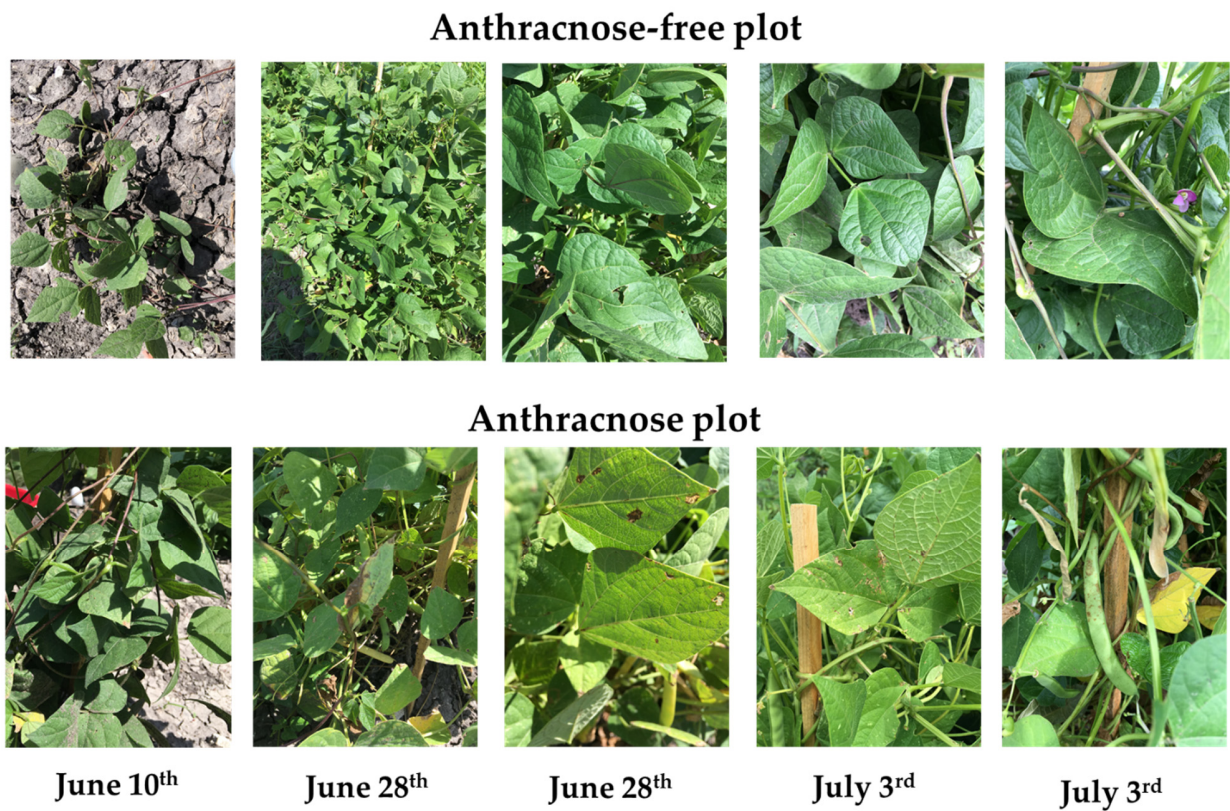

**Table S3.** Results of individual Kruskal-Wallis tests of the effects of inoculation with *Colletotrichum*, bean cultivar and *Trichoderma* spp. on herbivore damage (% of removed leaf area) in the field experiment.

| Factor                | Chi-squared | DF | P      |
|-----------------------|-------------|----|--------|
| <i>Colletotrichum</i> | 8.99        | 1  | 0.0027 |
| Cultivar              | 7.67        | 3  | 0.0532 |
| <i>Trichoderma</i>    | 9.16        | 4  | 0.0572 |

‘*Colletotrichum*’ refers to the experimental conditions (anthracnose-free plots vs. anthracnose plots),

‘Cultivar’ refers to the four bean cultivars tested

‘*Trichoderma*’ refers to the inoculation of bean seeds with one of the four tested *Trichoderma* strains or no *Trichoderma* inoculation.

**Figure S4.** Damage of young bean plantlets by chewing herbivores as a major cause of plant mortality

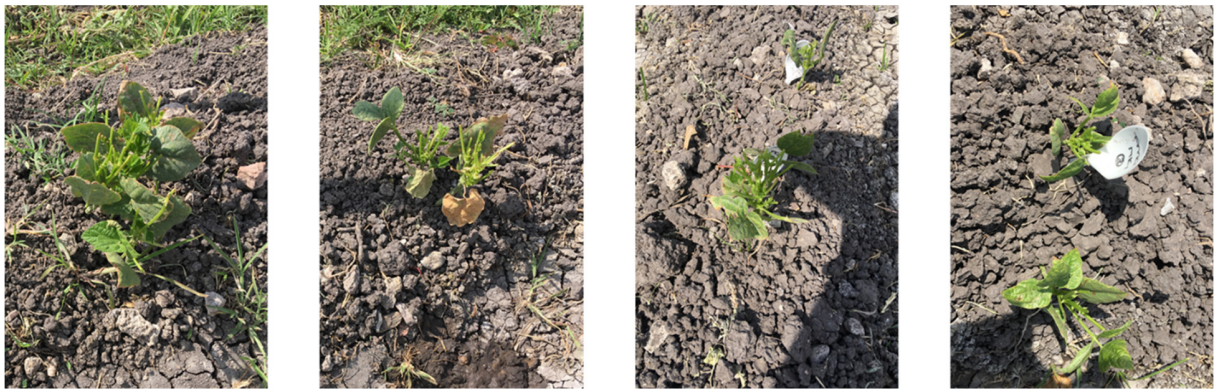

**Table S4.** Results of individual Kruskal-Wallis tests of the effects of inoculation with *Colletotrichum*, bean cultivar and *Trichoderma* spp. on seed yield (gram seeds per plant) in the field experiment.

| Factor                | Chi-squared | DF | P                     |
|-----------------------|-------------|----|-----------------------|
| <i>Colletotrichum</i> | 1.05        | 1  | 0.3048                |
| Cultivar              | 201.88      | 3  | 2.2×10 <sup>-16</sup> |
| <i>Trichoderma</i>    | 6.87        | 4  | 0.1429                |

‘*Colletotrichum*’ refers to the experimental conditions (anthracnose-free plots vs. anthracnose plots),

‘Cultivar’ refers to the four bean cultivars tested

‘*Trichoderma*’ refers to the inoculation with one of the four tested *Trichoderma* strains or no *Trichoderma* inoculation.
